# Supplementary material
Source: publisher figshare collection journal article supplement (https://rs.figshare.com/ndownloader/files/14701292)
Supplement: Supplementary file 1 [file 14701292]

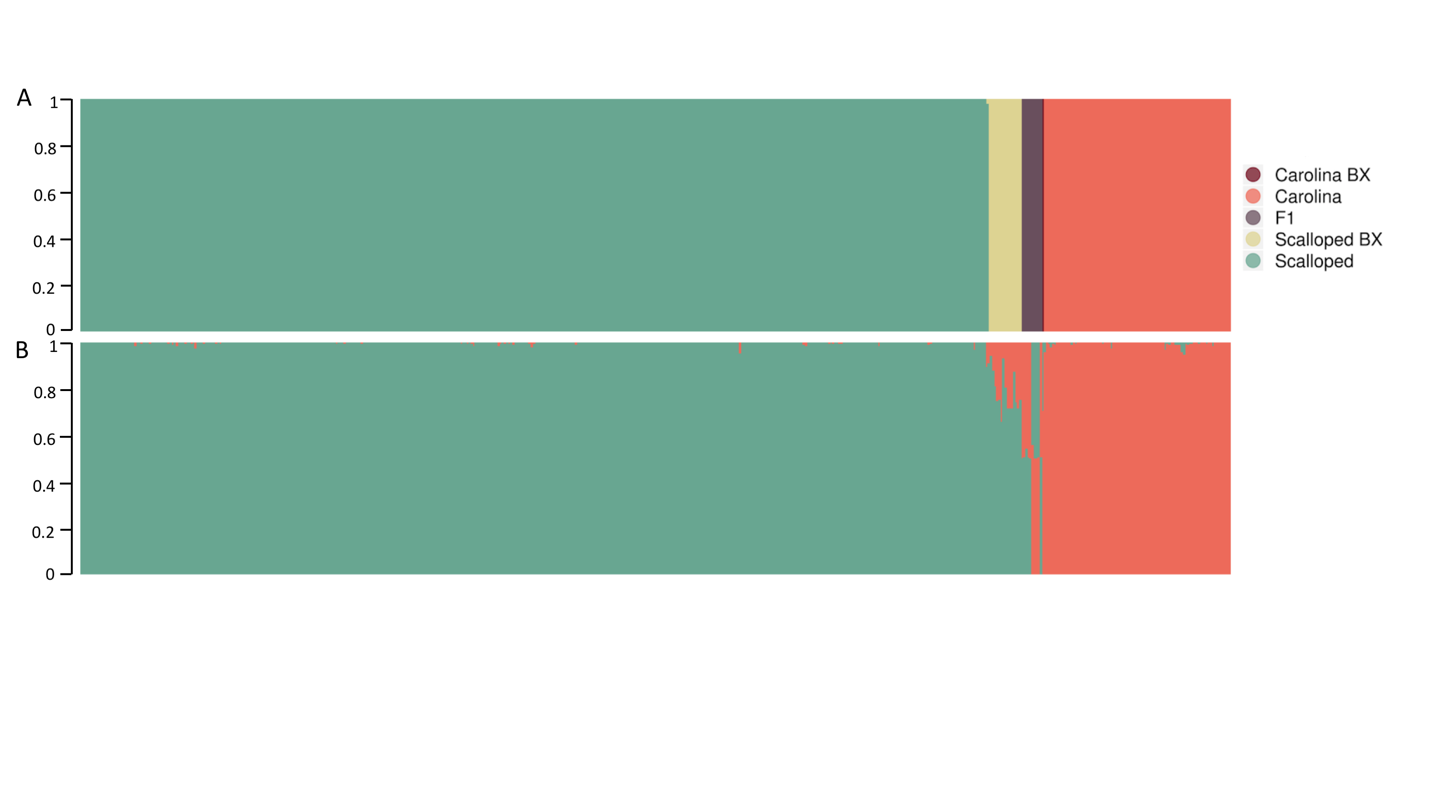
 Supplemental Figure 1 (A) Posterior probabilities of genotype class membership calculated by NewHybrids. (B) Individual admixture coefficients calculated by Structure. Individuals are ordered the same way in each plot.
